# Supplementary material for: Novel Multi-Responsive Hyperbranched Polyelectrolyte Polyplexes as Potential Gene Delivery Vectors
Source: MDPI journal article supplement (doi:10.3390/pharmaceutics15061627), 2023-05-30
Supplement: s1 [file s1]

## Supplementary Materials

### Novel Multi-Responsive Hyperbranched Polyelectrolyte Polyplexes as Potential Gene Delivery Vectors

Dimitrios Selianitis <sup>1</sup>, Hector Katifelis <sup>2</sup>, Maria Gazouli <sup>2</sup> and Stergios Pispas <sup>1,\*</sup>

Dynamic Light Scattering measurements for the P(OEGMA-co-DIPAEMA) polyplexes

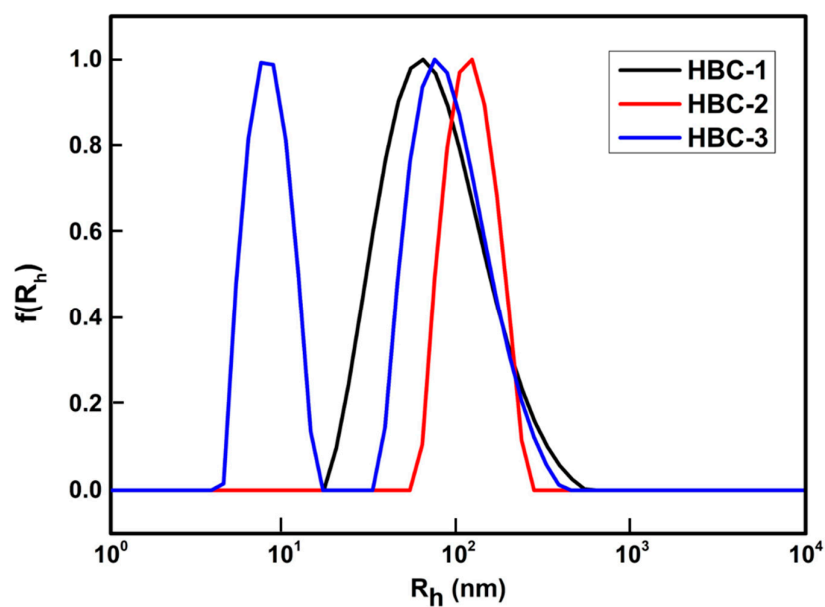

Figure S1: Comparative size distributions from DLS for P(OEGMA-co-DIPAEMA)/DNA polyplexes at N/P 2.
